# Supplementary material for: Cellular senescence-related genes: predicting prognosis in hepatocellular carcinoma
Source: PubMed Central journal article supplement (PMC10585749; doi:10.1186/s12885-023-11288-1), 2023-10-18
Supplement: 12885_2023_11288_MOESM1_ESM.pdf [file 12885_2023_11288_MOESM1_ESM.pdf]

**Table S1: 279 genes associated with cellular senescence**

ACLY  
AAK1  
ABI3  
ADCK5  
AKR1B1  
AGT  
AKT1  
ALOX15B  
AR  
ARPC1B  
ASF1A  
ASPH  
ATF7IP  
ATM  
AURKA  
AXL  
BAG3  
BHLHE40  
BCL6  
BLK  
BLVRA  
BMI1  
BRAF  
BRD7  
BRCA1  
BTG3  
C11orf31  
CAV1  
CBX7  
CBX8  
CCND1  
CDK1  
CDK18  
CDK2AP1  
CDK6  
CDK4  
CDKN1A  
CDKN1C  
CDKN1B  
CDKN2A  
CDKN2AIP  
CDKN2B

CENPA  
CEBPB  
CHEK1  
CKB  
CPEB1  
CSNK1A1  
CTNNAL1  
CSNK2A1  
CXCL1  
DDB2  
CYR61  
DEK  
DGCR8  
DHCR24  
DLX2  
DHX9  
DPY30  
DUSP3  
DUSP16  
E2F1  
EHF  
ENDOG  
EPA3  
ERRF1  
ETS1  
ETS2  
EWSR1  
FASTK  
EZH2  
FBXO31  
FOXM1  
FOS  
FOXO3  
FXR1  
G6PD  
GAPDH  
GKN1  
GATA4  
GNG11  
GLB1  
GRK6  
HDAC4  
HDAC1  
HEPACAM

HJURP  
HIVEP1  
HK3  
HMGB1  
HRAS  
HSPA5  
HSPB2  
ID1  
ID4  
IGFBP1  
IFNG  
IGFBP3  
IGFBP6  
IGFBP5  
IL1A  
IL8  
ING1  
ING2  
IRF3  
IRF5  
IRF7  
ITPK1  
ITGB4  
ITPKB  
ITSN2  
KCNJ12  
KDM4A  
KDM5B  
KIAA1524  
KL  
KSR2  
LATS1  
LEO1  
LGALS3  
LIMA1  
LIMK1  
MAGEA2  
MAGOH  
MAD2L1  
MAGOHB  
MAP2K1  
MAP2K3  
MAP2K2  
MAP2K6

MAP3K6  
MAP2K7  
MAP4K1  
MAP3K7  
MAPK12  
MAPKAPK5  
5-Mar  
MAPK14  
MAST1  
MATK  
MCL1  
MDH1  
MCRS1  
MECP2  
MOB3A  
MMP9  
MORC3  
MORF4  
MXD4  
MVK  
MYC  
MYLK  
NADK  
NANOG  
NDRG1  
NEK1  
NEK4  
NEK6  
NFE2L2  
NINJ1  
NOTCH3  
NOX4  
NR2E1  
NTN4  
NUAK1  
OTX2  
P3H1  
PATZ1  
PAK4  
PBRM1  
PCGF2  
PDCD10  
PDIK1L  
PDZD2

PDPK1  
PEBP1  
PEX19  
PIAS4  
PIK3R5  
PIK3C2A  
PIM1  
PLA2R1  
PKM  
PML  
PNPT1  
PMVK  
POT1  
POU5F1  
PPM1B  
PPM1D  
PRMT6  
PRKCH  
PRKCD  
PROX1  
PRPF19  
PSMB5  
PTRF  
PTTG1  
PSMD14  
RAD21  
RAF1  
RB1  
RBP2  
RBX1  
RNASEL  
RPS6KA6  
RSL1D1  
RUNX1  
RUVBL2  
SENP1  
SENP2  
SENP7  
SERPINE1  
SFN  
SIK1  
SGK1  
SIN3B  
SIRT1

SIRT6  
SIX1  
SLC13A3  
SLC16A7  
SMARCA4  
SMG1  
SMARCB1  
SMURF2  
SNAI1  
SOCS1  
SOD1  
SORBS2  
SOX2  
SPIN1  
SOX5  
SP1  
SPOP  
SRC  
SREBF1  
SRSF1  
STAT5B  
STK32C  
STK40  
SUPT5H  
SYK  
TACC3  
TERC  
TBX2  
TERF2  
TERT  
TFAP4  
TFDP1  
TGFB111  
TLR3  
TMSB4X  
TNFSF13  
TNFSF15  
TOP1  
TP63  
TPR  
TP53  
TRIM28  
TRPM8  
TXN

TXNIP  
UBTD1  
TYK2  
VENTX  
USP1  
VEGFA  
WNT16  
WNT2  
WRN  
WT1  
XAF1  
WWP1  
YAP1  
YPEL3  
ZFP36  
ZMAT3  
ZNF148

**Table S2: QPCR primers of four genes**

EZH2  
Forward Sequence GACCTCTGTCTTACTTGTGGAGC  
Reverse Sequence CGTCAGATGGTGCCAGCAATAG

G6PD  
Forward Sequence CTGTTCCGTGAGGACCAGATCT  
Reverse Sequence TGAAGGTGAGGATAACGCAGGC

LGALS3  
Forward Sequence CCATCTTCTGGACAGCCAAGTG  
Reverse Sequence TATCAGCATGCGAGGCACCACT

PSMD14  
Forward Sequence GTCAGTGTGGAGGCAGTTGATC  
Reverse Sequence CCACACCAGAAAGCCAACAACC
