# Supplementary material for: Cellular senescence-related genes: predicting prognosis in hepatocellular carcinoma
Source: PubMed Central journal article supplement (PMC10585749; doi:10.1186/s12885-023-11288-1), 2023-10-18
Supplement: 12885_2023_11288_MOESM2_ESM.pdf [file 12885_2023_11288_MOESM2_ESM.pdf]

**Table S2: Primer sequences used in this study**

EZH2

Forward Sequence GACCTCTGTCTTACTTGTGGAGC

Reverse Sequence CGTCAGATGGTGCCAGCAATAG

G6PD

Forward Sequence CTGTTCCGTGAGGACCAGATCT

Reverse Sequence TGAAGGTGAGGATAACGCAGGC

LGALS3

Forward Sequence CCATCTTCTGGACAGCCAAGTG

Reverse Sequence TATCAGCATGCGAGGCACCACT

PSMD14

Forward Sequence GTCAGTGTGGAGGCAGTTGATC

Reverse Sequence CCACACCAGAAAGCCAACAACC
